# Supplementary material
Source: publisher site journal article supplement (https://www.dovepress.com/get_supplementary_file.php?f=276497.docx)
Supplement: Supplementary file 1 [file get_supplementary_file.php]

**Supplementary materials**

**Supplementary Methods**

**Molecular karyotype**

DNA from tested samples was extracted using NucleoSpin blood extraction kit by Macherey-Nagel. CytoScan® 750K Array by Afffymetrix was used for the detection of Copy Number Variations and LOH. Results were analyzed using Chromosome Analysis Suite (ChAS). For the evaluation Decipher, DGV, ClinVar, OMIM, NetAffyx, COSMIC and Ensemble databases were used.

**Next generation sequencing**

Genomic DNA (gDNA) was extracted from bone marrow aspirate or peripheral blood using Nucleospin DNA kit (Macherey Nagel), and was quantified using a Qubit DNA BR assay kit (Thermo Fisher Scientific). A commercial panel of 40 genes frequently mutated in myeloid malignancies was used, covering ***hotspots regions:*** *ABL1, BRAF, CBL, CSF3R, DNMT3A, FLT3, GATA2, HRAS, IDH1, IDH2, JAK2, KIT, KRAS, MPL, MYD88, NPM1, NRAS, PTPN11, SETBP1, SF3B1, SRSF2, U2AF1, WT1 and* ***full genes:*** *ASXL1, BCOR, CALR, CEBPA, ETV6, EZH2, IKZF1, NF1, PHF6, PRPF8, RB1, RUNX1, SH2B3, STAG2, TET2, TP53, ZRSR2* (Ion Torrent Oncomine Myeloid Research Assay, Thermo Fisher Scientific). The genomic library was prepared using 50 ng of DNA template. The generated library was purified using Agencourt AMPure XP magnetic beads (Beckman Coulter) and then subjected to NGS using Ion S5 System (Thermo Fisher Scientific). Using human genome build 19 (hg 19) as a reference, variant calling was performed with Ion Reporter Software version 5.10. Ion Reporter Software provides several annotation sources derived from public and private annotation databases (such as COSMIC, ClinVar, dbSNP, DGV, DrugBank, NHLBI ESP, ExAC) and has several functionalities including mapping of variants, automatic translation of variants and their genomic position to Human Genome Variation Society compliant nomenclature, identification of amplicons with suboptimal coverage for clinical reporting, and self-updating population analysis, which identified reference genome polymorphisms or sequencing artifacts. To visualize read alignment and confirm the variant calls, Integrative Genomics Viewer (IGV, Broad Institute) was used. For clinical reporting, a sequencing coverage of 500X and a variant frequency of 5% in the background of wild-type were used as cutoffs. Among the 40 genes in the panel, NPM1 mutations and FLT3 internal tandem duplication (ITD) were confirmed with fragment analysis using capillary electrophoresis.

**Fragment analysis**

Detection of NPM1 mutations was performed on genomic DNA by polymerase chain reaction (PCR) and fragment analysis. To amplify the exon 12 of NPM1, we used a fluorescently labeled forward primer 5-(dyeD4) TGTCTATGAAGTGTTGTGGTTCCTT-3 (Sigma-Aldrich) and a reverse primer 5-CGGTAGGGAAAGTTCTCACTCTG-3 (Sigma-Aldrich). DNA was amplified using the HotStarTaq Plus Master Mix Kit (Qiagen). Fluorescent PCR products were subjected to capillary electrophoresis on denaturing polyacrylamide gel and analyzed by the CEQ 8000 Genetic Analysis System (Beckman Coulter). The data were processed using Genetic Analysis System Software (Beckman Coulter). Samples from healthy controls show one peak at 201 bp. As all NPM1 mutations result in the insertion of 4 nucleotides, the mutated profile was defined by the presence of an additional peak at 204 bp.

Detection of FLT3-ITD mutations was performed on genomic DNA by polymerase chain reaction (PCR) and fragment analysis as previously described. To amplify the exons 14 and 15 of FLT3, we used a forward primer 5-GCAATTTAGGTATGAAAGCCAGC-3 (Sigma-Aldrich) and fluorescently labeled reverse primer 5-(dyeD3): CTTTCAGCATTTTGACGGCAACC-3 (Sigma-Aldrich). Samples from healthy controls show one peak at 329 bp. The amplicons with a size greater than that of wild type were interpreted as positive for the ITD mutation. The FLT3-ITD mutant allelic burden was calculated as the ratio of the area under the curve of mutant and wild-type alleles (mutant/total FLT3).

**Pyrosequencing analysis**

Mutation detection was performed with pyrosequencing on a PyromarkQ24 using using therascreen® IVD Pyro® kit (Qiagen) for *BRAF* codons 464 (GGA), 466 (GGA), 469 (GGA) and 600 (GTG). Mutations tested : p.Gly464Glu (c.1391G>A), p.Gly464Val (c.1391G>T), p.Gly466Glu (c.1397G>A), p.Gly466Val (c.1397G>T), p.Gly469Glu (c.1406G>A), p.Gly469Ala (c.1406G>C), p.Gly469Val (c.1406G>T), p.Gly469Ser (c. 1405_1406GG>TC), p.Val600Glu (c.1799T>A), p.Val600Gly (c.1799T>G), p.Val600Ala (c.1799T>C), p.Val600Met (c.1798G>A), p.Val600Glucomplex (c.1799_1800TG>AA), p.Val600Asp (c.1799_1800TG>AT), p.Val600Lys (c.1798_1799GT>AA), p.Val600Arg (c.1798_1799GT>AG).

Supplementary Table 1: List of detected CNVs and LOH.

| **Chromosome** | **Cytoband Start** | **Cytoband End** | **CN State** | **Size (kbp)** | **OMIM ® Genes Count** | **OMIM ® Genes** |
| --- | --- | --- | --- | --- | --- | --- |
| 2 | p23.3 | p23.2 | 1.00 | 4,344 | 53 | *NCOA1 (602691), CENPO (611504), ADCY3 (600291), DNAJC27 (613527), EFR3B (616797), POMC (176830), DNMT3A (602769), DTNB (602415), ASXL2 (612991), KIF3C (602845), RAB10 (612672), HADHA (600890), HADHB (143450), EPT1 (607915), DRC1 (615288), OTOF (603681), CIB4 (610646), KCNK3 (603220), CENPA (117139), DPYSL5 (608383), MAPRE3 (605788), TMEM214 (615301), AGBL5 (615900), EMILIN1 (130660), KHK (614058), CGREF1 (606137), ABHD1 (612195), PREB (606395), TCF23 (609635), SLC5A6 (604024), CAD (114010), SLC30A3 (602878), DNAJC5G (613946), TRIM54 (606474), UCN (600945), MPV17 (137960), GTF3C2 (604883), EIF2B4 (606687), SNX17 (605963), ZNF513 (613598), PPM1G (605119), NRBP1 (606010), IFT172 (607386), FNDC4 (611905), GCKR (600842), GPN1 (611479), SUPT7L (612762), SLC4A1AP (602655), MRPL33 (610059), RBKS (611132), BRE (610497), FOSL2 (601575), PLB1 (610179)* |
| 2 | p25.2 | p25.1 | 1.00 | 2,838 | 5 | *CMPK2 (611787), RSAD2 (607810), ID2 (600386), KIDINS220 (615759), MBOAT2 (611949)* |
| 2 | p23.2 | p23.1 | 1.00 | 531 | 1 | *ALK (105590)* |
| 4 | q27 | q28.1 | 1.00 | 1,704 | 6 | *IL21 (605384), BBS12 (610683), FGF2 (134920), NUDT6 (606261), SPATA5 (613940), SPRY1 (602465)* |
| 5 | p15.2 | p14.3 | LOH | 8,413 | 14 | *MARCH6 (613297), ROPN1L (611756), DAP (600954), CTNND2 (604275), DNAH5 (603335), TRIO (601893), OTULIN (615712), ANKH (605145), FBXL7 (605656), MARCH11 (613338), ZNF622 (608694), FAM134B (613114), MYO10 (601481), BASP1 (605940)* |
| 10 | p13 | p11.22 | LOH | 15,846 | 55 | *PTER (604446), C1QL3 (615227), RSU1 (179555), CUBN (602997), TRDMT1 (602478), VIM (193060), ST8SIA6 (610139), HACD1 (610467), STAM (601899), MRC1 (153618), SLC39A12 (608734), CACNB2 (600003), ARL5B (608909), PLXDC2 (606827), NEBL (605491), MIR1915 (615202), MLLT10 (602409), DNAJC1 (611207), EBLN1 (613249), COMMD3 (616700), BMI1 (164831), SPAG6 (605730), PIP4K2A (603140), ARMC3 (611226), MSRB2 (613782), PTF1A (607194), OTUD1 (612022), ARHGAP21 (609870), PRTFDC1 (610751), ENKUR (611025), THNSL1 (611260), GPR158 (614573), MYO3A (606808), GAD2 (138275), APBB1IP (609036), PDSS1 (607429), ABI1 (603050), ANKRD26 (610855), YME1L1 (607472), MASTL (608221), ACBD5 (616618), PTCHD3 (611791), RAB18 (602207), MKX (601332), ARMC4 (615408), MPP7 (610973), WAC (615049), BAMBI (604444), SVIL (604126), KIAA1462 (614398), MTPAP (613669), MAP3K8 (191195), LYZL2 (612748), ZEB1-AS1 (616915), ZEB1 (189909)* |
| 10 | q21.2 | q21.3 | LOH | 7,314 | 14 | *RHOBTB1 (607351), ARID5B (608538), ZNF365 (607818), ADO (611392), EGR2 (129010), NRBF2 (616477), JMJD1C (604503), REEP3 (609348), CTNNA3 (607667), LRRTM3 (610869), DNAJC12 (606060), SIRT1 (604479), HERC4 (609248), MYPN (608517)* |
| 10 | p14 | p13 | LOH | 7,286 | 18 | *ITIH5 (609783), ITIH2 (146640), KIN (601720), ATP5C1 (108729), TAF3 (606576), GATA3 (131320), CELF2 (602538), USP6NL (605405), UPF2 (605529), DHTKD1 (614984), NUDT5 (609230), CAMK1D (607957), OPTN (602432), MCM10 (609357), PHYH (602026), SEPHS1 (600902), PRPF18 (604993), FRMD4A (616305)* |
| 10 | q23.2 | q23.31 | 1.00 | 1,575 | 15 | *PAPSS2 (603005), ATAD1 (614452), KLLN (612105), PTEN (601728), RNLS (609360), LIPJ (613921), LIPF (601980), LIPK (613922), LIPN (613924), LIPM (613923), STAMBPL1 (612352), ACTA2 (102620), FAS (134637), CH25H (604551), LIPA (613497)* |
| 13 | q14.11 | q14.3 | 1.00 | 7,118 | 39 | *CCDC122 (613408), LACC1 (613409), TSC22D1 (607715), NUFIP1 (604354), GTF2F2 (189969), TPT1 (600763), SLC25A30 (610793), COG3 (606975), SIAH3 (615609), ZC3H13 (616453), CPB2 (603101), LCP1 (153430), LRCH1 (610368), ESD (133280), HTR2A (182135), SUCLA2 (603921), NUDT15 (615792), MED4 (605718), ITM2B (603904), RB1 (614041), LPAR6 (609239), RCBTB2 (603524), CYSLTR2 (605666), FNDC3A (615794), MLNR (602885), CAB39L (612175), SETDB2 (607865), PHF11 (607796), RCBTB1 (607867), ARL11 (609351), KPNA3 (601892), SPRYD7 (607866), DLEU2 (605766), TRIM13 (605661), KCNRG (607947), MIR16-1 (609704), MIR15A (609703), DLEU1 (605765), RNASEH2B (610326)* |
| 13 | q14.11 | q14.11 | 1.00 | 2,434 | 9 | *COG6 (606977), FOXO1 (136533), MRPS31 (611992), SLC25A15 (603861), ELF1 (189973), WBP4 (604981), MTRF1 (604601), RGCC (610077), DGKH (604071)* |
| 13 | q13.1 | q13.2 | 1.00 | 1,580 | 6 | *FRY (614818), BRCA2 (600185), N4BP2L2 (615788), PDS5B (605333), KL (604824), STARD13 (609866)* |
| 13 | q13.3 | q13.3 | 1.00 | 544 | 4 | *SPG20 (607111), CCNA1 (604036), RFXAP (601861), SMAD9 (603295)* |
| 14 | q24.1 | q24.2 | 1.00 | 2,870 | 12 | *SUSD6 (616761), SRSF5 (600914), SLC10A1 (182396), SMOC1 (608488), SLC8A3 (607991), SYNJ2BP (609411), ADAM21 (603713), ADAM20 (603712), MED6 (602984), TTC9 (610488), MAP3K9 (600136), RGS6 (603894)* |
| 14 | q21.3 | q22.1 | 1.00 | 2,510 | 19 | *KLHDC1 (611281), KLHDC2 (611280), NEMF (608378), ARF6 (600464), VCPKMT (615260), SOS2 (601247), L2HGDH (609584), CDKL1 (603441), MAP4K5 (604923), ATL1 (606439), SAV1 (607203), NIN (608684), PYGL (613741), TRIM9 (606555), TMX1 (610527), FRMD6 (614555), GNG2 (606981), C14orf166 (610858), NID2 (605399)* |
| 14 | q22.1 | q22.2 | 1.00 | 1,689 | 7 | *STYX (615814), GNPNAT1 (616510), FERMT2 (607746), DDHD1 (614603), BMP4 (112262), CDKN3 (123832), CNIH1 (611287)* |
| 17 | q21.2 | q22 | LOH | 11,580 | 164 | *STAT5B (604260), STAT5A (601511), STAT3 (102582), PTRF (603198), ATP6V0A1 (192130), NAGLU (609701), HSD17B1 (109684), COASY (609855), MLX (602976), PSMC3IP (608665), FAM134C (616498), TUBG1 (191135), TUBG2 (605785), CCR10 (600240), CNTNAP1 (602346), EZH1 (601674), RAMP2 (605154), VPS25 (610907), WNK4 (601844), COA3 (614775), BECN1 (604378), PSME3 (605129), AOC2 (602268), AOC3 (603735), G6PC (613742), AARSD1 (613212), RPL27 (607526), IFI35 (600735), VAT1 (604631), RND2 (601555), BRCA1 (113705), NBR1 (166945), ARL4D (600732), DHX8 (600396), ETV4 (600711), MEOX1 (600147), SOST (605740), DUSP3 (600183), MPP3 (601114), CD300LG (610520), MPP2 (600723), PPY (167780), PYY (600781), NAGS (608300), LSM12 (611793), G6PC3 (611045), HDAC5 (605315), ASB16 (615056), UBTF (600673), SLC4A1 (109270), RUNDC3A (605448), SLC25A39 (610820), GRN (138945), ITGA2B (607759), GPATCH8 (614396), FZD2 (600667), MEIOC (616934), DBF4B (611661), ADAM11 (155120), GJC1 (608655), EFTUD2 (603892), CCDC103 (614677), GFAP (137780), KIF18B (614570), C1QL1 (611586), NMT1 (160993), PLCD3 (608795), HEXIM1 (607328), HEXIM2 (615695), FMNL1 (604656), MAP3K14 (604655), ARHGAP27 (610591), PLEKHM1 (611466), CRHR1 (122561), SPPL2C (608284), MAPT (157140), STH (607067), KANSL1 (612452), LRRC37A (616555), LRRC37A2 (616556), NSF (601633), WNT3 (165330), WNT9B (602864), GOSR2 (604027), CDC27 (116946), MYL4 (160770), ITGB3 (173470), NPEPPS (606793), KPNB1 (602738), TBKBP1 (608476), TBX21 (604895), OSBPL7 (606735), MRPL10 (611825), SCRN2 (614966), SP6 (608613), SP2 (601801), PNPO (603287), CDK5RAP3 (608202), COPZ2 (615526), MIR152 (613788), NFE2L1 (163260), CBX1 (604511), SNX11 (614906), SKAP1 (604969), HOXB1 (142968), HOXB2 (142967), HOXB3 (142966), HOXB4 (142965), MIR10A (610173), HOXB5 (142960), HOXB6 (142961), HOXB7 (142962), HOXB8 (142963), HOXB9 (142964), MIR196A1 (608632), PRAC1 (609819), PRAC2 (610787), HOXB13 (604607), TTLL6 (610849), CALCOCO2 (604587), ATP5G1 (603192), UBE2Z (611362), SNF8 (610904), GIP (137240), IGF2BP1 (608288), B4GALNT2 (111730), GNGT2 (139391), ABI3 (606363), ZNF652 (613907), PHB (176705), NGFR (162010), NXPH3 (604636), SPOP (602650), SLC35B1 (610790), KAT7 (609880), TAC4 (607833), DLX4 (601911), DLX3 (600525), ITGA3 (605025), PDK2 (602525), PPP1R9B (603325), SGCA (600119), HILS1 (608101), COL1A1 (120150), XYLT2 (608125), MRPL27 (611837), EME1 (610885), LRRC59 (614854), ACSF2 (610465), CHAD (602178), MYCBPAP (609835), EPN3 (607264), SPATA20 (613939), CACNA1G (604065), ABCC3 (604323), LUC7L3 (609434), WFIKKN2 (610895), TOB1 (605523), SPAG9 (605430), NME1 (156490), NME2 (156491), UTP18 (612816), CA10 (604642), KIF2B (615142)* |

**Supplementary Table 2:** Genes included in missing genetic loci or in regions with LOH and the molecular pathways in which they are involved.

| **Implicated genes** | **Molecular pathways** |
| --- | --- |
| *DNMT3A, miR152* | DNA methylation |
| *ASXL2, MLL10, BMI1, ARID5B, JMJD1CSETDB2, RCBTB1, HDAC5* | Histone modification |
| *FAS, miR10A* | Apoptosis |
| *miR16-1, EME1* | DNA damage repair machinery |
| *DLEU2, CCNA1* | Cell cycle regulation |
| *PREB, PIP4K2ACAMK1D, CAB39L, STAT5B, STAT5A, HOXB3, HOXB5* | Transcriptional factors |
| *ALK, MASTL, MAP3K14* | Protein kinases |
| *CCR10* | Chemokine receptor |
| *TRIM13* | Protein ubiquitination |
| *RPL27* | Ribosome formation |
